# Supplementary material for: CAR-Macrophages and CAR-T Cells Synergistically Kill Tumor Cells In Vitro
Source: MDPI journal article supplement (doi:10.3390/cells11223692), 2022-11-21
Supplement: s1 [file s1]

## The Supplementary Materials for

**Table S1.** CAR component sequences.

| <b>Signal peptide:</b>                       |                                                                           |
|----------------------------------------------|---------------------------------------------------------------------------|
| <b>CD8<math>\alpha</math> signal peptide</b> | MALPVTALLPLALLHAARP                                                       |
| <b>ScFv:</b>                                 |                                                                           |
| CD19 scFv (FMC63)                            | DIQMTQTSSLSASLGDRVTISCRASQDISKYLNWYQQKPDGTVKLLI-                          |
|                                              | YHTSRLHSGVPSRFSGSGSGTDYSLTISNLEQEDIATYFCQQGNTLPYTFGGGTKLEITGGG            |
|                                              | GSGGGGSGGGGSEVKLQESGPGLVAPSQSLSVTCTVSGVSLPDYGVSWIRQP-                     |
|                                              | PRKGLEWLGVWGSETTYNSALKSRLTIKDNSKSQVFLKMNSLQTDDTAIYYCAKHYYY                |
|                                              | GGSYAMDYWGQGTSTVTVSS                                                      |
| <b>Hinge and transmembrane domain:</b>       |                                                                           |
| CD8 $\alpha$ hinge and Transmembrane         | TTTPAPRPPTPAPTIASQPLSLRPEACRPAAGGAVHTRGLDFACDIYWAPLAG-<br>TCGVLLLSLVITLYC |
| <b>Intracellular signaling domains:</b>      |                                                                           |
| FcR $\gamma$                                 | RLKIQVRKAAIASREKADAVYTGLNTRSQETYETLKHEKPPQ                                |
| PI3K                                         | LYAAPQLHSIQSGPSHEEDADSYENMDKSDDEPA                                        |
| Megf10                                       | YRHKQKRKESSMPAVTYTPAMRVINADYTIAETLPHSNGGNANSHYFTNPSYHT-                   |
|                                              | LSQCATSPHVNNRDRMTIAKSKNNQLFVNLKNVNPGRGTLDCTGTLPADWKQGGYL                  |
|                                              | NELGAFGLDRSYMKGSLKDLGKNSEYNSSTCSLSSSENPYATIKDPPALLPKS-                    |
|                                              | SECGYVEMK-                                                                |
|                                              | SPARRDSPYAEINNSTPANRNVYEVEPTVSVVQGVFSNSGHVTQDPYDLPKNSHIPCHYDL             |
|                                              | LPVRDSSSPKREDGGGSNSTSSNSTSSSSSSSE                                         |
| <b>Linker between CAR and GFP:</b>           |                                                                           |
| Linker between CAR and GFP                   | GSGS                                                                      |
| <b>GFP:</b>                                  |                                                                           |
| GFP                                          | MVSKGEELFTGVVPILVELDGDVNGHKFSVSGEGEDATYGLTKLFICTTGKLPVPWPT-               |
|                                              | LVTTLTYGVQCFSRYPDHMKQHDFFKSAMPEGYVQERTIFFKDDGNYKTRAEVKFEEDTL              |
|                                              | VNRIELKGIDFKEDGNILGHKLEYNNSHNVYIMADKQKNGIKVNFKIR-                         |
|                                              | HNIEDGSGVLADHYQQNTPIGDGPVLLPDNHYLSTQSALSKDPNEKRDHMLLEFVTAAGITLGMDELYK     |

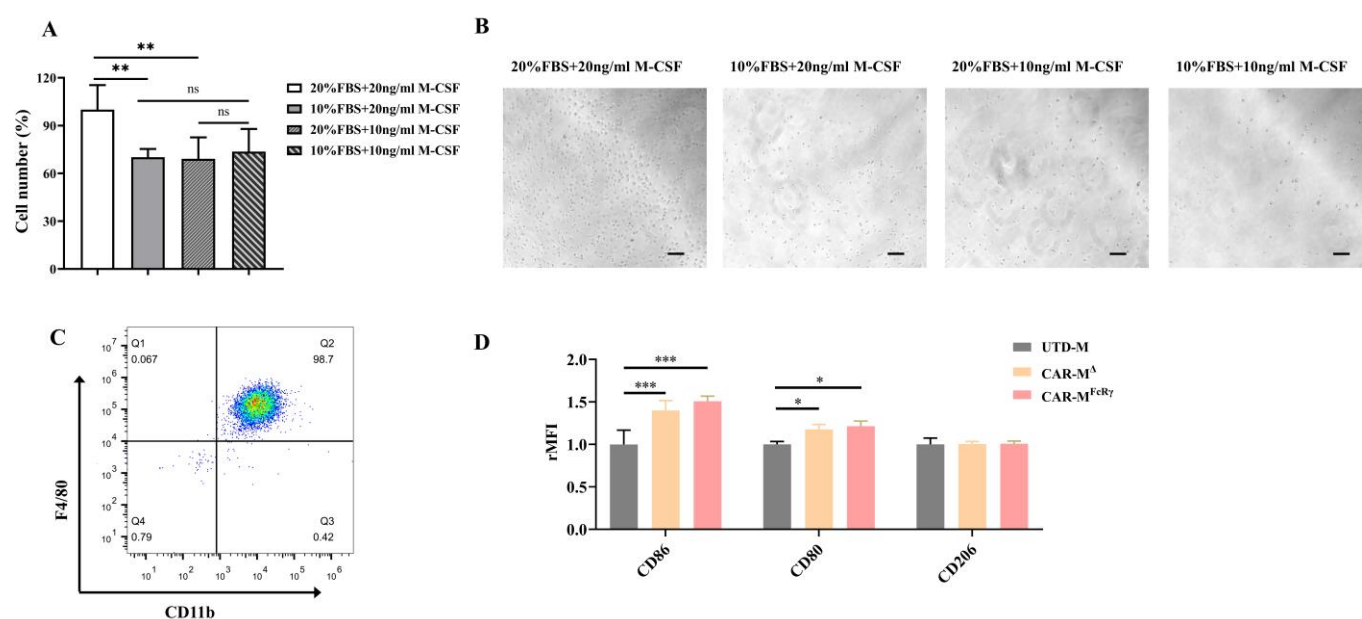

**Figure S1.** Bone marrow derived macrophages (BMDM) harvested with different medium and macrophage polarization M1 and M2 surface markers expression in different macrophages after lentiviral transduction. **(A)** Cell number of BMDM harvested after culture with different medium for 6 days. **(B)** Images of BMDM cultured with different medium for 6 days. Scale bar = 100  $\mu$ m. **(C)** Flow cytometry characterization of BMDM using F480 and CD11b. **(D)** Quantification of surface markers (CD86, CD80, CD206) expression in different macrophages after lentiviral transduction from (Figure 1D). Data are represented as the mean  $\pm$  SD of  $n = 3$  biological replicates. UTD-M, untransduced macrophage; rMFI, relative mean fluorescence intensity. Statistical significance was calculated using one-way ANOVA analysis (\* $p \leq 0.05$ , \*\* $p \leq 0.01$ ), \*\*\* $p \leq 0.001$ ).

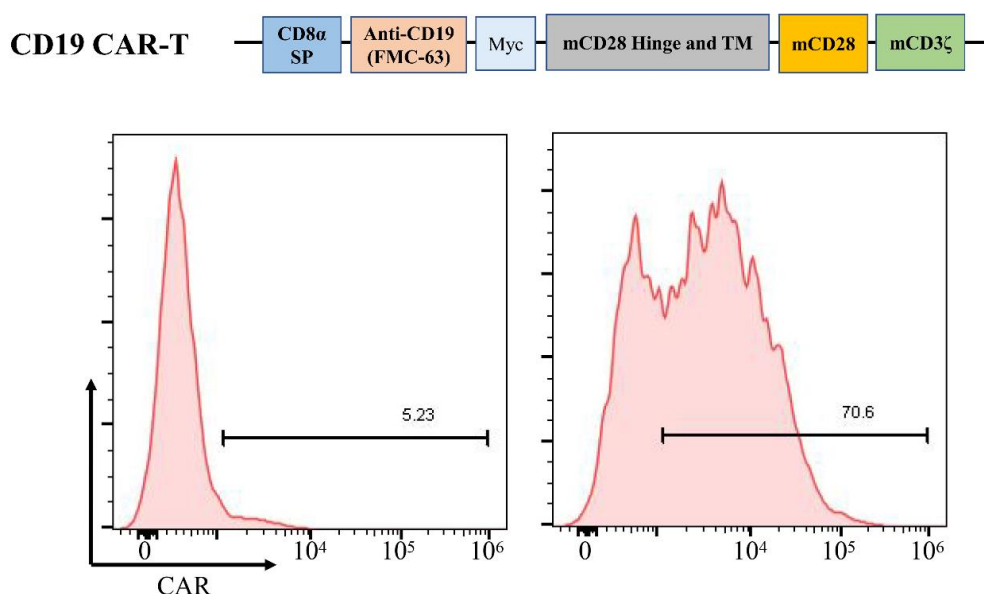

**Figure S2.** Construction and identification of murine CD19 CAR-T. **(A)** Schematic representation of retroviral vector expressing CD19 CAR construct. SP, signal peptide; TM, transmembrane domain. **(B)** Flow cytometric analysis of CAR expression on CAR-T cells.

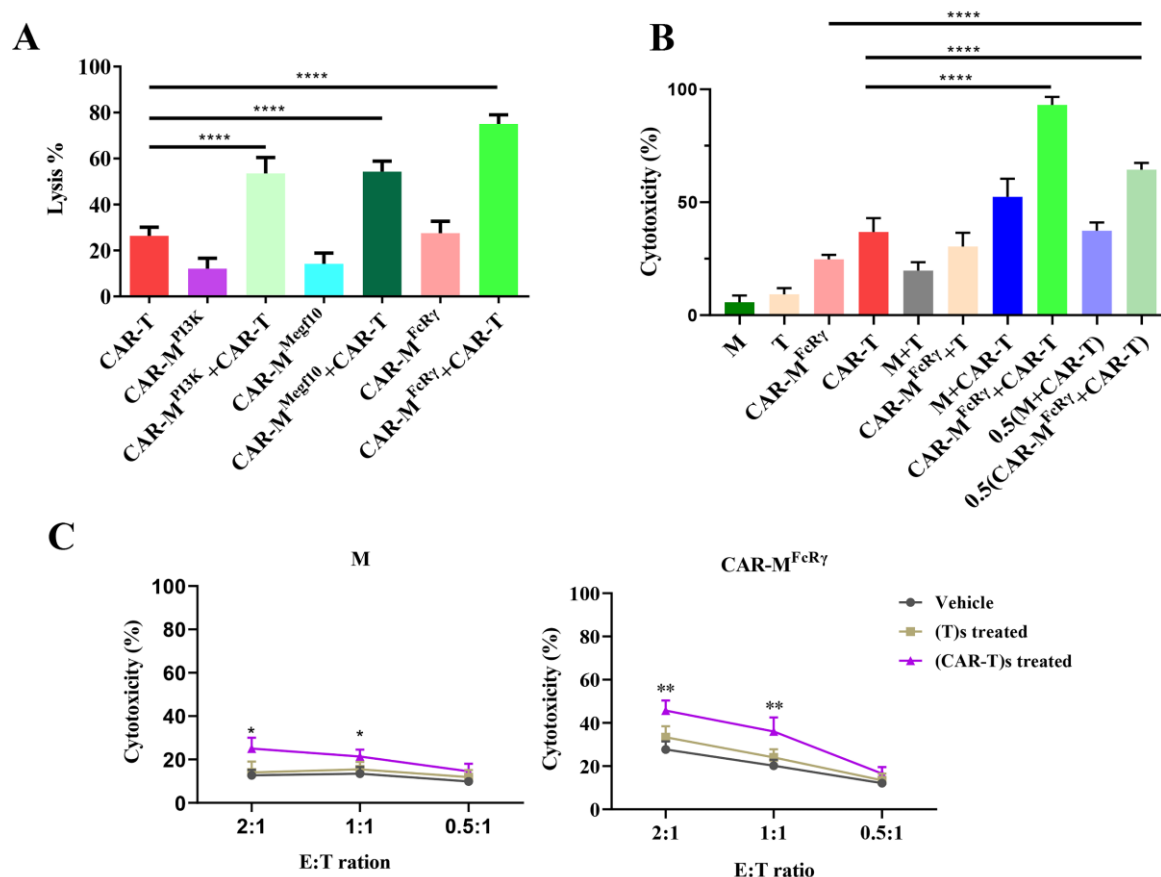

**Figure S3.** CAR-T and CAR-M demonstrated synergistic cytotoxicity against murine target cell Sp2/0-CD19+. **(A)** Luciferase-based cytotoxicity assay against Raji by CAR-T, CAR-Ms or the combination of CAR-M and CAR-T. The assay was performed after 48 h co-culture at an E:T ratio of 1 (CAR-T or CAR-Ms alone) or 2 (CAR-M + CAR-T). **(B)** Cytotoxicity assay against Sp2/0-CD19+ cells by different immune effector cells alone or different combination regimens after 48 h co-culture at an E:T ratio of 1 (M, T, CAR-M<sup>Fcγ</sup>, CAR-T, 0.5 (CAR-M<sup>Fcγ</sup> + CAR-T), 0.5 (CAR-M<sup>Fcγ</sup> + CAR-T)) or 2 (M + T, CAR-M<sup>Fcγ</sup> + T, M + CAR-T, CAR-M<sup>Fcγ</sup> + CAR-T). M, GFP-M; T, untransduced T cells. **(C)** M or CAR-M<sup>Fcγ</sup> was treated by (T)s or (CAR-T)s for 24 h prior to cytotoxicity assay against Raji. Assays were performed after 48 h co-culture at different E:T ratios (2, 1 or 0.5). Data are represented as the mean ± SD of *n* = 3 biological replicates. Statistical significance was calculated using two-tailed Student t-test or one-way ANOVA analysis (\**p* ≤ 0.05, \*\**p* ≤ 0.01, \*\*\*\**p* ≤ 0.0001).

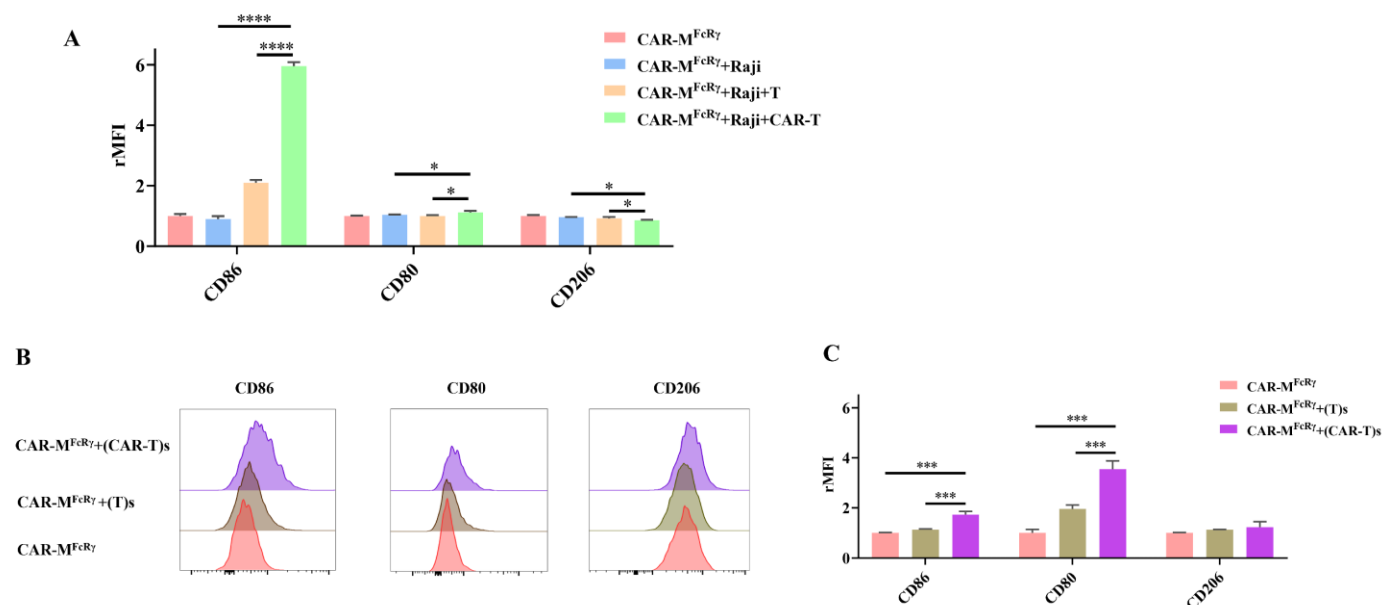

**Figure S4.** The polarization phenotype of CAR-M<sup>FcRγ</sup> from killing assay in combination with CAR-T or treated by the supernatants of CAR-T with Raji cells co-culture system. **(A)** Quantification of surface markers (CD86, CD80, CD206) expression of CAR-M<sup>FcRγ</sup> alone or co-cultured with Raji, Raji + T, Raji + CAR-T from (Figure. 4. D). Data are represented as the mean  $\pm$  SD of  $n = 3$  biological replicates. **(B)** Flow cytometric analysis of macrophage polarization M1 and M2 surface markers (CD86, CD80, CD206) of CAR-M<sup>FcRγ</sup> alone or treated by (T)s or (CAR-T)s for 24 h. The supernatants of T and CAR-T with Raji cells co-culture system after 48 h at an E:T ratio of 2 were referred to as (T)s and (CAR-T)s, respectively. **(C)** Quantification of surface markers (CD86, CD80, CD206) expression of CAR-M<sup>FcRγ</sup> alone or treated by (T)s or (CAR-T)s from panel (B). Data are represented as the mean  $\pm$  SD of  $n = 3$  biological replicates. rMFI, relative mean fluorescence intensity. Statistical significance was calculated using one-way ANOVA analysis (\* $p \leq 0.05$ , \*\*\* $p \leq 0.001$ , \*\*\*\* $p \leq 0.0001$ ).

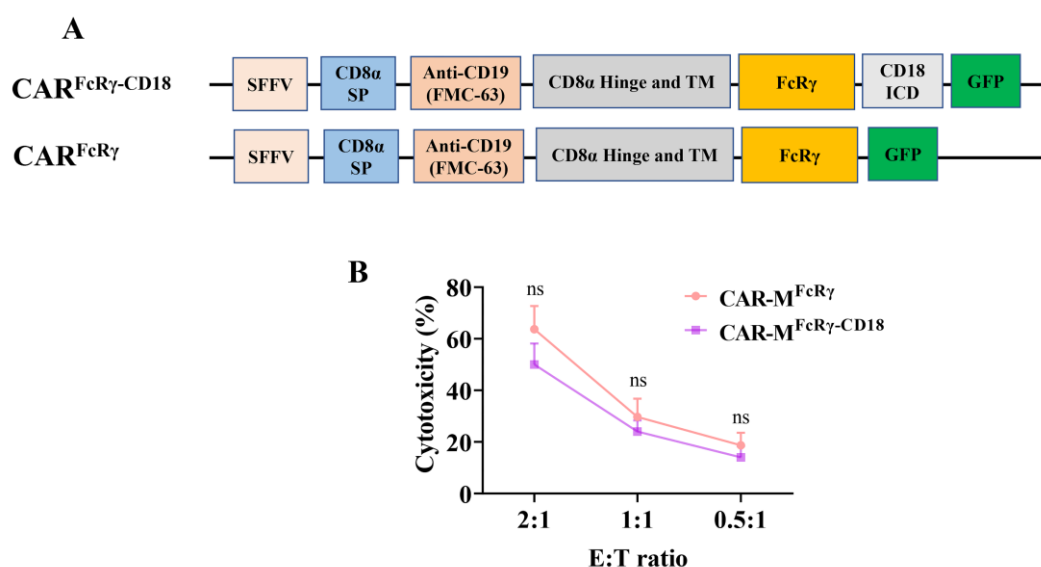

**Figure S5.** Comparison of cytotoxicity of CAR-M<sup>FcRγ</sup>-CD18 and CAR-M<sup>FcRγ</sup>. **(A)** Schematic representation of lentiviral vectors expressing CAR<sup>FcRγ</sup>-CD18 and CAR<sup>FcRγ</sup>. CD18 (aa 726-771 of Mouse CD18, Uniprot P11835). **(B)** Cytotoxicity assay against Raji by CAR-M<sup>FcRγ</sup>-CD18 and CAR-M<sup>FcRγ</sup> after 48 h co-culture at different E:T ratios (2, 1 or 0.5). Data represent the mean  $\pm$  SD of  $n = 3$  biological replicates. Statistical significance was calculated using two-tailed Student t-test (ns, not significant).
